# Supplementary material
Source: MDPI journal article supplement (https://www.mdpi.com/2073-445X/12/9/1818)
Supplement: s1 [file s1]

**Table S1. Interviewees list**

| Interviewee No. | Position                                      | Organisation                                                                             |
|-----------------|-----------------------------------------------|------------------------------------------------------------------------------------------|
| 1               | Director of Railway Yard Department           | China Railway Company                                                                    |
| 2               | Director of Railway Yard Department           | China Railway Third Survey and Design Group                                              |
| 3               | Director of Architecture Department           | China Railway Third Survey and Design Group                                              |
| 4               | Director of Transport and Economic Department | China Railway Third Survey and Design Group                                              |
| 5               | Chief Engineer                                | China Railway Fourth Survey and Design Group                                             |
| 6               | Director of Railway Yard Department           | China Railway Fourth Survey and Design Group                                             |
| 7               | Director of Architecture Department           | China Railway Fourth Survey and Design Group                                             |
| 8               | Director of Transport and Economic Department | China Railway Fourth Survey and Design Group                                             |
| 9               | Senior Planner                                | Tongji Architectural Design Co., Ltd                                                     |
| 10              | Senior Planner                                | Shenzhen branch of the China Academy of Urban Planning and Design                        |
| 11              | Director                                      | Land Resource Bureau of a medium-sized city                                              |
| 12              | Director of Railway Office                    | Development and Reform Commission of a medium-sized city                                 |
| 13              | Manager of Passenger Management Branch        | Transport Bureau of a medium-sized city                                                  |
| 14              | Director                                      | Urban Planning Bureau of a medium-sized city                                             |
| 15              | Director                                      | Housing Construction Committee Construction and Management Center of a medium-sized city |
| 16              | Senior Planner                                | Planning and Design Institute of a medium-sized city                                     |
| 17              | Senior Planner                                | Urban-Rural Planning Bureau of a large city                                              |
| 18              | Professor                                     | Beijing Jiaotong University                                                              |
| 19              | Professor                                     | Wuhan University                                                                         |

**Table S2. Summary of the hierarchy of nodes**

| Name                                          | Sources | References |
|-----------------------------------------------|---------|------------|
| Total                                         | 15      | 1303       |
| Context and Governance                        | 15      | 177        |
| City area                                     | 14      | 33         |
| GDP                                           | 12      | 21         |
| Population                                    | 11      | 17         |
| Visions                                       | 15      | 106        |
| City gateway & landmark                       | 6       | 18         |
| Commercial and business center                | 8       | 19         |
| Integrated transport hub                      | 9       | 11         |
| New city center or sub-center                 | 5       | 16         |
| New town                                      | 9       | 24         |
| Provide service for region and urban clusters | 5       | 15         |
| Tourism and travel-related services center    | 3       | 3          |
| Transport and Interchange                     | 15      | 458        |
| Connected HSR lines                           | 15      | 27         |
| Distance to city center                       | 15      | 28         |
| Passenger number                              | 15      | 28         |
| Pedestrian priority                           | 5       | 9          |
| Pedestrian-vehicle separation                 | 8       | 13         |
| Planning of local transport methods           | 15      | 165        |
| BRTs and Bus                                  | 14      | 39         |
| Metro                                         | 11      | 21         |
| Parking                                       | 13      | 29         |
| Private car                                   | 12      | 21         |
| Taxis                                         | 12      | 20         |
| Walking and Cycling                           | 11      | 32         |
| Public transport priority                     | 9       | 14         |
| Road network                                  | 15      | 103        |
| Road system                                   | 15      | 81         |
| Road width                                    | 10      | 22         |
| Seamless transfer                             | 11      | 39         |
| Station level                                 | 15      | 17         |
| Traffic volume of different methods           | 7       | 15         |
| Land Use Planning                             | 15      | 668        |
| Architecture aesthetics                       | 15      | 100        |
| Design of public space                        | 14      | 76         |
| Floor area ratio                              | 14      | 47         |
| Land use before development                   | 14      | 57         |
| Cultivated land, Woodland and fishpond        | 11      | 35         |
| Industrial and warehousing land               | 7       | 10         |
| Residential land                              | 6       | 12         |

|                                     |    |     |
|-------------------------------------|----|-----|
| Land use percentage                 | 15 | 34  |
| Land use types                      | 15 | 297 |
| Business and financial functions    | 15 | 72  |
| Commercial function                 | 15 | 67  |
| Green area                          | 13 | 46  |
| Residential function                | 13 | 48  |
| Squares and parking                 | 11 | 29  |
| Tourism function                    | 9  | 31  |
| Mix of housing types                | 9  | 19  |
| New residential housing development | 9  | 13  |
| Resettlement of farmers             | 3  | 5   |
| Station area                        | 15 | 38  |

---



|                                                        |    |    |    |    |    |    |    |    |    |    |    |    |    |    |    |
|--------------------------------------------------------|----|----|----|----|----|----|----|----|----|----|----|----|----|----|----|
| <b>13 : Tourism and travel-related services center</b> | 0  | 0  | 0  | 0  | 0  | 0  | 0  | 0  | 1  | 0  | 0  | 0  | 1  | 1  | 0  |
| <b>14 : Land Use Planning</b>                          | 51 | 40 | 29 | 47 | 31 | 73 | 29 | 32 | 20 | 35 | 46 | 72 | 21 | 27 | 19 |
| <b>15 : Architecture aesthetics</b>                    | 10 | 3  | 2  | 6  | 7  | 15 | 1  | 3  | 2  | 7  | 6  | 23 | 6  | 2  | 7  |
| <b>16 : Design of public space</b>                     | 8  | 2  | 5  | 15 | 2  | 14 | 0  | 3  | 2  | 6  | 4  | 6  | 6  | 2  | 1  |
| <b>17 : Floor area ratio</b>                           | 2  | 3  | 4  | 3  | 4  | 5  | 2  | 3  | 0  | 2  | 8  | 7  | 1  | 2  | 1  |
| <b>18 : Land use before development</b>                | 1  | 2  | 0  | 3  | 2  | 3  | 3  | 2  | 5  | 3  | 8  | 2  | 1  | 8  | 3  |
| <b>19 : Cultivated land, Woodland and fishpond</b>     | 1  | 1  | 0  | 3  | 2  | 3  | 2  | 2  | 5  | 0  | 7  | 2  | 0  | 7  | 0  |
| <b>20 : Industrial and warehousing land</b>            | 0  | 1  | 0  | 0  | 0  | 0  | 2  | 1  | 0  | 1  | 0  | 0  | 1  | 1  | 3  |
| <b>21 : Residential land</b>                           | 0  | 1  | 0  | 0  | 2  | 0  | 0  | 0  | 0  | 3  | 2  | 0  | 0  | 2  | 2  |
| <b>22 : Land use percentage</b>                        | 3  | 3  | 2  | 2  | 1  | 2  | 5  | 2  | 2  | 4  | 1  | 1  | 1  | 2  | 3  |
| <b>23 : Land use types</b>                             | 29 | 25 | 13 | 27 | 15 | 30 | 13 | 20 | 7  | 11 | 16 | 31 | 5  | 11 | 5  |
| <b>24 : Business and financial functions</b>           | 5  | 8  | 5  | 4  | 6  | 9  | 2  | 4  | 3  | 2  | 5  | 11 | 4  | 3  | 1  |
| <b>25 : Commercial function</b>                        | 9  | 7  | 5  | 8  | 4  | 5  | 3  | 7  | 2  | 1  | 2  | 9  | 1  | 1  | 3  |
| <b>26 : Green area</b>                                 | 6  | 2  | 2  | 3  | 3  | 6  | 3  | 4  | 0  | 4  | 4  | 4  | 0  | 2  | 3  |
| <b>27 : Residential function</b>                       | 1  | 6  | 0  | 5  | 0  | 4  | 4  | 6  | 1  | 5  | 5  | 2  | 2  | 3  | 4  |

|                                                 |    |    |    |    |    |    |    |    |    |    |    |    |    |    |    |
|-------------------------------------------------|----|----|----|----|----|----|----|----|----|----|----|----|----|----|----|
| <b>28 : Squares and parking</b>                 | 6  | 0  | 2  | 3  | 4  | 1  | 2  | 1  | 0  | 3  | 2  | 4  | 0  | 0  | 1  |
| <b>29 : Tourism function</b>                    | 4  | 4  | 2  | 2  | 0  | 11 | 0  | 1  | 1  | 0  | 0  | 3  | 0  | 3  | 0  |
| <b>30 : Mix of housing types</b>                | 0  | 3  | 0  | 1  | 0  | 2  | 1  | 2  | 0  | 1  | 5  | 0  | 1  | 0  | 2  |
| <b>31 : New residential housing development</b> | 0  | 2  | 0  | 1  | 0  | 2  | 1  | 2  | 0  | 1  | 2  | 0  | 1  | 0  | 1  |
| <b>32 : Resettlement of farmers</b>             | 0  | 1  | 0  | 0  | 0  | 0  | 0  | 0  | 0  | 0  | 3  | 0  | 0  | 0  | 1  |
| <b>33 : Station area</b>                        | 3  | 3  | 3  | 2  | 2  | 2  | 4  | 1  | 2  | 2  | 2  | 2  | 3  | 3  | 4  |
| <b>34 : Transport and Interchange</b>           | 32 | 29 | 36 | 21 | 17 | 43 | 16 | 32 | 29 | 21 | 16 | 27 | 22 | 27 | 12 |
| <b>35 : Connected HSR lines</b>                 | 1  | 3  | 1  | 1  | 2  | 4  | 2  | 2  | 1  | 1  | 1  | 1  | 2  | 2  | 3  |
| <b>36 : Distance to city center</b>             | 2  | 1  | 2  | 1  | 1  | 1  | 2  | 3  | 1  | 2  | 1  | 1  | 3  | 4  | 3  |
| <b>37 : Passenger number</b>                    | 2  | 2  | 2  | 1  | 1  | 4  | 1  | 4  | 1  | 1  | 1  | 1  | 1  | 2  | 4  |
| <b>38 : Pedestrian priority</b>                 | 0  | 0  | 1  | 2  | 0  | 1  | 0  | 0  | 0  | 0  | 0  | 4  | 0  | 1  | 0  |
| <b>39 : Pedestrian-vehicle separation</b>       | 0  | 0  | 1  | 3  | 1  | 2  | 0  | 0  | 1  | 2  | 0  | 2  | 0  | 1  | 0  |
| <b>40 : Planning of local transport methods</b> | 22 | 13 | 10 | 11 | 10 | 15 | 6  | 6  | 5  | 7  | 7  | 9  | 6  | 7  | 1  |
| <b>41 : BRTs and Bus</b>                        | 6  | 6  | 2  | 2  | 2  | 2  | 1  | 2  | 1  | 3  | 3  | 3  | 2  | 4  | 0  |
| <b>42 : Metro</b>                               | 1  | 2  | 3  | 1  | 2  | 4  | 2  | 1  | 0  | 3  | 1  | 0  | 1  | 0  | 0  |

|                                                 |   |   |    |   |   |   |   |   |    |   |   |   |   |   |   |
|-------------------------------------------------|---|---|----|---|---|---|---|---|----|---|---|---|---|---|---|
| <b>43 : Parking</b>                             | 8 | 2 | 2  | 2 | 2 | 4 | 2 | 1 | 1  | 1 | 1 | 0 | 2 | 0 | 1 |
| <b>44 : Private car</b>                         | 4 | 2 | 1  | 0 | 1 | 1 | 1 | 1 | 2  | 0 | 1 | 2 | 2 | 3 | 0 |
| <b>45 : Taxis</b>                               | 3 | 1 | 1  | 1 | 1 | 3 | 0 | 1 | 2  | 0 | 1 | 3 | 1 | 2 | 0 |
| <b>46 : Walking and Cycling</b>                 | 6 | 1 | 2  | 3 | 5 | 4 | 0 | 3 | 0  | 1 | 0 | 3 | 1 | 3 | 0 |
| <b>47 : Public transport priority</b>           | 1 | 2 | 0  | 1 | 0 | 3 | 0 | 2 | 1  | 0 | 1 | 2 | 0 | 1 | 0 |
| <b>48 : Road network</b>                        | 5 | 5 | 8  | 3 | 4 | 5 | 2 | 8 | 15 | 9 | 9 | 7 | 5 | 8 | 7 |
| <b>49 : Road system</b>                         | 4 | 5 | 6  | 2 | 4 | 4 | 2 | 7 | 15 | 7 | 6 | 3 | 2 | 7 | 7 |
| <b>50 : Road width</b>                          | 1 | 0 | 2  | 2 | 0 | 1 | 0 | 1 | 0  | 2 | 3 | 5 | 3 | 2 | 0 |
| <b>51 : Seamless transfer</b>                   | 2 | 1 | 10 | 0 | 0 | 6 | 1 | 6 | 2  | 0 | 0 | 1 | 7 | 2 | 1 |
| <b>52 : Station level</b>                       | 1 | 1 | 1  | 1 | 1 | 1 | 1 | 1 | 1  | 1 | 1 | 1 | 2 | 1 | 2 |
| <b>53 : Traffic volume of different methods</b> | 0 | 2 | 1  | 0 | 0 | 2 | 2 | 4 | 3  | 0 | 0 | 0 | 0 | 0 | 1 |
